# Supplementary material
Source: PubMed Central journal article supplement (PMC4298513)
Supplement: JCM.02758-14_zjm999094006so1.pdf [file JCM.02758-14_zjm999094006so1.pdf]

Figure S1 Jeong YH et al.

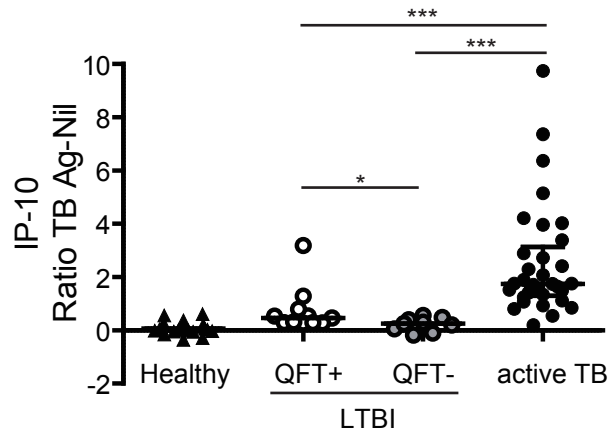

**Figure S1. Ratio of TB-specific to mitogen-induced responses.** Whole blood was stimulated with *M. tb*-specific antigen (ESAT-6, CFP-10 and TB7.7) or with mitogen for 24 h and the levels of TB-specific and mitogen-induced IP-10 was measured in active TB patients, LTBI and non-TB healthy control. LTBI group was divided into QFT positive and QFT negative to compare the responses \*P < 0.05; \*\*P < 0.01; \*\*\*P < 0.001.

**Table S1. Optimal cutoff values with associated sensitivity and specificity to discriminate between active TB and LTBI who are positive to both TST and QFT**

| Analytical criteria | Target        | Cutoff  | Sensitivity (%) | Specificity (%) |
|---------------------|---------------|---------|-----------------|-----------------|
| TB Ag               | IL-13         | 4.880   | 78.79           | 63.64           |
|                     | IFN- $\gamma$ | 173.5   | 93.94           | 36.36           |
|                     | IP-10         | 19566   | 72.73           | 90.91           |
| TB Ag/mitogen ratio | IL-13         | 0.03945 | 78.79           | 72.73           |
|                     | IFN- $\gamma$ | 0.04135 | 90.91           | 54.55           |
|                     | IP-10         | 0.7980  | 93.94           | 81.82           |
